# Supplementary material
Source: PubMed Central journal article supplement (PMC4858480)
Supplement: CJN.08190815_CJN08190815SupplementaryData.pdf [file CJN.08190815_CJN08190815SupplementaryData.pdf]

## **Supplementary appendix**

### **Early requirement for renal replacement therapy in children at presentation in the United Kingdom: association with transplantation and survival**

**Authors and affiliations:** Rishi Pruthi<sup>1</sup> MRCP (UK), Anna Casula<sup>1</sup> PhD, Carol Inward<sup>2</sup> FRCPCH, Paul Roderick<sup>3</sup> PhD, Manish D Sinha<sup>4</sup> MRCP (UK) on behalf of the British Association for Paediatric Nephrology.

<sup>1</sup>UK Renal Registry, Bristol, UK; <sup>2</sup>Bristol Royal Hospital for Children, Bristol, UK; <sup>3</sup>Primary Care and Population Sciences, University of Southampton, UK; <sup>4</sup>Evelina London Children's Hospital, London, UK

#### **Correspondence**

Dr Manish D Sinha, Department of Paediatric Nephrology, Room 64, SKY LEVEL, Evelina London Children's Hospital, Guys & St Thomas' NHS Foundation Trust, Westminster Bridge Road, LONDON SE1 7EH, United Kingdom

Tel: +44 20 7188 4587; Fax: +44 20 7188 4971

Email: [manish.sinha@nhs.net](mailto:manish.sinha@nhs.net)

**Table S1: Patient characteristics at baseline of all children and their distribution by late-referral and early referral.**

|                                          | Late Referrals       |                      |                     | Early Referrals     | p-value |
|------------------------------------------|----------------------|----------------------|---------------------|---------------------|---------|
|                                          | <7days               | 7-<30days            | 30-<90days          | >=90                |         |
| <b>Total, N (%)</b>                      | 217 (13.5%)          | 84 (5.2%)            | 107 (6.7%)          | 1,195 (74.5%)       | -       |
| <b>Age at presentation, median (IQR)</b> | 11.8<br>(6.7 - 13.9) | 10.9<br>(5.9 - 13.8) | 9.2<br>(2.3 - 13.1) | 2.1<br>(0.1 - 7.6)  | <0.001  |
| <b>Age at presentation</b>               |                      |                      |                     | <b>N (%)</b>        | <0.001  |
| 0 - <1 year                              | 13 (6.0)             | 8 (9.5)              | 16 (15.0)           | 485 (40.6)          |         |
| 1 - 1.9 years                            | 14 (6.5)             | 4 (4.8)              | 9 (8.4)             | 103 (8.6)           |         |
| 2 - 3.9 years                            | 9 (4.1)              | 4 (4.8)              | 11 (10.3)           | 116 (9.7)           |         |
| 4 - 7.9 years                            | 25 (11.5)            | 13 (15.5)            | 12 (11.2)           | 215 (18.0)          |         |
| 8 - 11.9 years                           | 51 (23.5)            | 22 (26.2)            | 22 (20.6)           | 186 (15.6)          |         |
| 12 - 16 years                            | 105 (48.4)           | 33 (39.3)            | 37 (34.6)           | 90 (7.5)            |         |
| <b>Age at Start of RRT, median (IQR)</b> | 11.8<br>(6.7 - 13.9) | 10.9<br>(5.9 - 13.9) | 9.3<br>(2.5 - 13.2) | 9.6<br>(5.0 - 13.2) | 0.002   |
| <b>Age at Start of RRT</b>               |                      |                      |                     | <b>N (%)</b>        | <0.001  |
| 3 months - 1.9 years                     | 26 (12.0)            | 12 (14.3)            | 24 (22.4)           | 126 (10.5)          |         |
| 2 - 3.9 years                            | 10 (4.6)             | 4 (4.8)              | 11 (10.3)           | 127 (10.6)          |         |
| 4 - 7.9 years                            | 25 (11.5)            | 13 (15.5)            | 13 (12.2)           | 221 (18.5)          |         |
| 8 - 11.9 years                           | 51 (23.5)            | 21 (25.0)            | 22 (20.6)           | 294 (24.6)          |         |
| 12 - 16 years                            | 105 (48.4)           | 34 (40.5)            | 37 (34.6)           | 427 (35.7)          |         |
| <b>Gender</b>                            |                      |                      |                     |                     | <0.001  |
| Female                                   | 127 (58.5)           | 49 (58.3)            | 55 (51.4)           | 447 (37.4)          |         |
| Male                                     | 90 (41.5)            | 35 (41.7)            | 52 (48.6)           | 748 (62.6)          |         |
| <b>Ethnicity*</b>                        |                      |                      |                     |                     | 0.30    |
| Black                                    | 10 (4.6)             | 5 (6.0)              | 4 (3.7)             | 30 (2.5)            |         |
| Other                                    | 12 (5.5)             | 4 (4.8)              | 9 (8.4)             | 47 (3.9)            |         |
| South Asian                              | 34 (15.7)            | 13 (15.7)            | 17 (15.9)           | 203 (17.1)          |         |
| White                                    | 161 (74.2)           | 61 (73.5)            | 77 (72.0)           | 910 (76.5)          |         |
| <b>Time Period at Start of RRT</b>       |                      |                      |                     |                     | 0.70    |
| 1996-2001 (%)                            | 67 (30.9)            | 31 (36.9)            | 38 (35.5)           | 393 (32.9)          |         |
| 2002-2007 (%)                            | 83 (38.2)            | 24 (28.6)            | 32 (29.9)           | 419 (35.1)          |         |
| 2008-2012 (%)                            | 67 (30.9)            | 29 (34.5)            | 37 (34.6)           | 383 (32.1)          |         |

|                                  |            |           |           |            |      |
|----------------------------------|------------|-----------|-----------|------------|------|
| <b>Primary Renal Diagnosis**</b> |            |           |           |            | N/A  |
| Congenital nephrotic syndrome    | 3 (1.4)    | 3 (3.6)   | 8 (7.5)   | 80 (6.7)   |      |
| Drug nephrotoxicity              | 4 (1.9)    | 1 (1.2)   | 4 (3.8)   | 11 (0.9)   |      |
| Glomerular Disease               | 55 (25.7)  | 27 (32.5) | 37 (34.9) | 221 (18.6) |      |
| Malignancy & associated disease  | 5 (2.3)    | 0 (0)     | 4 (3.8)   | 13 (1.1)   |      |
| Metabolic                        | 8 (3.7)    | 1 (1.2)   | 1 (0.9)   | 67 (5.6)   |      |
| Obstructive Uropathy             | 7 (3.3)    | 2 (2.4)   | 7 (6.6)   | 225 (18.9) |      |
| Polycystic kidney disease        | 2 (0.9)    | 1 (1.2)   | 3 (2.8)   | 39 (3.3)   |      |
| Reflux Nephropathy               | 10 (4.7)   | 6 (7.2)   | 5 (4.7)   | 72 (6.1)   |      |
| Renal Dysplasia                  | 37 (17.3)  | 21 (25.3) | 14 (13.2) | 332 (27.9) |      |
| Renovascular Disease             | 7 (3.3)    | 3 (3.6)   | 4 (3.8)   | 33 (2.8)   |      |
| Tubulo-interstitial Diseases     | 38 (17.8)  | 11 (13.3) | 11 (10.4) | 74 (6.2)   |      |
| Uncertain aetiology              | 38 (17.8)  | 7 (8.4)   | 8 (7.5)   | 22 (1.9)   |      |
| <b>Centre size</b>               |            |           |           |            | 0.09 |
| Small                            | 40 (18.4)  | 9 (10.7)  | 13 (12.2) | 228 (19.1) |      |
| Large                            | 177 (81.6) | 75 (89.3) | 94 (87.8) | 967 (80.9) |      |

\* n=6 missing ethnicity, \*\*n=11 missing PRD

N/A not applicable as test not valid as many cells have expected value <5

**Table S2: Adjusted odds ratios of being referred late to a paediatric renal centre by patient specific variables including centre-size as an additional variable.**

|                                     | Odds Ratio | 95% LCL | 95% UCL | p-value |
|-------------------------------------|------------|---------|---------|---------|
| <b>Age at presentation</b>          |            |         |         |         |
| 0 - <1 year                         | 0.21       | 0.13    | 0.34    | <0.001  |
| 1 - 1.9 years                       | 0.60       | 0.36    | 1.03    | 0.60    |
| 2 - 3.9 years                       | 0.41       | 0.24    | 0.71    | 0.02    |
| 4 - 7.9 years                       | 0.45       | 0.29    | 0.68    | 0.01    |
| 8 - 11.9 years                      | 1          |         |         |         |
| 12 – 16 years                       | 3.66       | 2.51    | 5.35    | <0.001  |
| <b>Gender</b>                       |            |         |         |         |
| Female                              | 1.71       | 1.30    | 2.25    | <0.001  |
| Male                                | 1          |         |         |         |
| <b>Ethnicity</b>                    |            |         |         |         |
| Black                               | 1.17       | 0.57    | 2.37    | 0.90    |
| Other                               | 1.86       | 1.01    | 3.43    | 0.04    |
| South Asian                         | 0.73       | 0.50    | 1.08    | 0.02    |
| White                               | 1          |         |         |         |
| <b>Time Period at Start of RRT</b>  |            |         |         |         |
| 1996-2001                           | 0.96       | 0.69    | 1.34    | 0.97    |
| 2002-2007                           | 0.94       | 0.67    | 1.30    | 0.70    |
| 2008-2012                           | 1          |         |         |         |
| <b>Primary Renal Diagnosis</b>      |            |         |         |         |
| Congenital nephrotic syndrome       | 1.47       | 0.74    | 2.90    | 0.80    |
| Drug nephrotoxicity                 | 1.65       | 0.60    | 4.56    | 0.90    |
| Glomerular Disease                  | 1.58       | 1.10    | 2.26    | 0.90    |
| Malignancy & associated disease     | 3.99       | 1.53    | 10.41   | 0.04    |
| Metabolic                           | 0.75       | 0.35    | 1.58    | 0.02    |
| Obstructive Uropathy                | 0.53       | 0.29    | 0.96    | <0.001  |
| Polycystic kidney disease           | 1.09       | 0.42    | 2.87    | 0.40    |
| Renovascular Disease                | 2.10       | 0.96    | 4.56    | 0.50    |
| Tubulo-interstitial Diseases        | 2.38       | 1.50    | 3.79    | 0.06    |
| Uncertain aetiology                 | 5.66       | 3.05    | 10.48   | <0.001  |
| Renal Dysplasia± Reflux Nephropathy | 1          |         |         |         |
| <b>Centre Size</b>                  |            |         |         |         |
| Small                               | 0.83       | 0.58    | 1.20    | 0.30    |
| Large                               | 1          |         |         |         |

**Table S3: Patient characteristics at baseline of all children and their distribution by late-referral and early referral in a smaller sub-group of limited PRDs\*\***

|                                          | All Children        | Late Referrals       | Early Referrals     | p-value |
|------------------------------------------|---------------------|----------------------|---------------------|---------|
| <b>Total, N (%)</b>                      | 858                 | 168 (19.6%)          | 690 (80.4%)         | -       |
| <b>Age at presentation, median (IQR)</b> | 1.7<br>(0.1 - 9.1)  | 12.1<br>(7.4 - 14.1) | 0.6<br>(0.03 - 5.9) | <0.001  |
| <b>Age at presentation</b>               | <b>N (%)</b>        | <b>N (%)</b>         | <b>N (%)</b>        | <0.001  |
| 0 - <1 year                              | 386 (45.0)          | 15 (8.9)             | 371 (53.8)          |         |
| 1 - 1.9 years                            | 57 (6.6)            | 6 (3.6)              | 51 (7.4)            |         |
| 2 - 3.9 years                            | 58 (6.8)            | 10 (6.0)             | 48 (7.0)            |         |
| 4 - 7.9 years                            | 112 (13.1)          | 13 (7.7)             | 99 (14.3)           |         |
| 8 - 11.9 years                           | 128 (14.9)          | 39 (23.2)            | 89 (12.9)           |         |
| 12 - 16 years                            | 117 (13.6)          | 85 (50.6)            | 32 (4.6)            |         |
| <b>Age at Start of RRT, median (IQR)</b> | 9.8<br>(4.7 - 13.2) | 12.1<br>(7.4 - 14.2) | 8.9<br>(4.4 - 12.9) | <0.001  |
| <b>Age at Start of RRT</b>               | <b>N (%)</b>        | <b>N (%)</b>         | <b>N (%)</b>        | <0.001  |
| 3 months - 1.9 years                     | 110 (12.8)          | 21 (12.5)            | 89 (12.9)           |         |
| 2 - 3.9 years                            | 85 (9.9)            | 10 (6.0)             | 75 (10.9)           |         |
| 4 - 7.9 years                            | 147 (17.1)          | 13 (7.7)             | 134 (19.4)          |         |
| 8 - 11.9 years                           | 204 (23.8)          | 39 (23.2)            | 165 (23.9)          |         |
| 12 - 16 years                            | 312 (36.4)          | 85 (50.6)            | 227 (32.9)          |         |
| <b>Gender</b>                            |                     |                      |                     | <0.001  |
| Female                                   | 304 (35.4)          | 89 (53.0)            | 215 (31.2)          |         |
| Male                                     | 554 (65.6)          | 79 (47.0)            | 475 (68.8)          |         |
| <b>Ethnicity*</b>                        |                     |                      |                     | 0.04    |
| Black                                    | 23 (2.7)            | 10 (6.0)             | 13 (1.9)            |         |
| Other                                    | 38 (4.4)            | 7 (4.2)              | 31 (4.5)            |         |
| South Asian                              | 118 (13.8)          | 22 (13.1)            | 96 (13.9)           |         |
| White                                    | 678 (79.1)          | 129 (76.8)           | 549 (79.6)          |         |
| <b>Time Period at Start of RRT</b>       |                     |                      |                     | 0.60    |
| 1996-2001 (%)                            | 265 (30.9)          | 56 (33.3)            | 209 (30.3)          |         |
| 2002-2007 (%)                            | 303 (35.3)          | 54 (32.1)            | 249 (36.1)          |         |
| 2008-2012 (%)                            | 290 (33.8)          | 58 (34.5)            | 232 (33.6)          |         |

|                                |            |            |            |        |
|--------------------------------|------------|------------|------------|--------|
| <b>Primary Renal Diagnosis</b> |            |            |            | <0.001 |
| Obstructive Uropathy           | 241 (28.1) | 16 (9.5)   | 225 (32.6) |        |
| Polycystic kidney disease      | 45 (5.2)   | 6 (3.6)    | 39 (5.7)   |        |
| Reflux Nephropathy             | 93 (10.8)  | 21 (12.5)  | 72 (10.4)  |        |
| Renal Dysplasia                | 404 (47.1) | 72 (42.9)  | 332 (48.1) |        |
| Uncertain aetiology            | 75 (8.7)   | 53 (31.6)  | 22 (2.3)   |        |
| <b>Centre Size</b>             |            |            |            | 0.20   |
| Small                          | 167 (19.5) | 26 (15.5)  | 141 (20.4) |        |
| Large                          | 691 (80.5) | 142 (84.5) | 549 (79.6) |        |

\* n=1 missing ethnicity

\*\* Obstructive uropathy, polycystic kidney disease, Reflux nephropaty and Dysplasia, and Uncertain aetiology

**Table S4: Adjusted odds ratios of being referred late to a paediatric renal centre by patient specific variables in a smaller sub-group of limited PRDs\*\***

|                                     | Odds Ratio | 95% LCL | 95% UCL | p-value |
|-------------------------------------|------------|---------|---------|---------|
| <b>Age at presentation</b>          |            |         |         |         |
| 0 - <1 years                        | 0.13       | 0.06    | 0.25    | <0.001  |
| 1 – 1.9 years                       | 0.3        | 0.11    | 0.81    | 0.13    |
| 2 - 3.9 years                       | 0.45       | 0.19    | 1.06    | 0.60    |
| 4 - 7.9 years                       | 0.29       | 0.14    | 0.62    | 0.03    |
| 8 - 11.9 years                      | 1          |         |         |         |
| 12 - 16 years                       | 5.43       | 2.99    | 9.89    | <0.001  |
| <b>Gender</b>                       |            |         |         |         |
| Female                              | 1.26       | 0.79    | 1.99    | 0.30    |
| Male                                | 1          |         |         |         |
| <b>Ethnicity*</b>                   |            |         |         |         |
| Black                               | 4.19       | 1.45    | 12.13   | 0.01    |
| Other                               | 1.63       | 0.56    | 4.70    | 0.70    |
| South Asian                         | 0.57       | 0.28    | 1.13    | 0.004   |
| White                               | 1          |         |         |         |
| <b>Time Period at Start of RRT</b>  |            |         |         |         |
| 1996-2001                           | 1.38       | 0.80    | 2.39    | 0.10    |
| 2002-2007                           | 0.86       | 0.50    | 1.48    | 0.20    |
| 2008-2012                           | 1          |         |         |         |
| <b>Primary Renal Diagnosis</b>      |            |         |         |         |
| Obstructive Uropathy                | 0.50       | 0.26    | 0.97    | <0.001  |
| Polycystic kidney disease           | 1.43       | 0.51    | 4.01    | 0.99    |
| Uncertain aetiology                 | 5.83       | 2.98    | 11.40   | <0.001  |
| Renal Dysplasia± Reflux Nephropathy | 1          |         |         |         |

\* n=1 missing ethnicity

\*\* Obstructive uropathy, polycystic kidney disease, Reflux nephropaty and Dysplasia, and Uncertain aetiology
